# Supplementary material for: Pan-cancer association of a centrosome amplification gene expression signature with genomic alterations and clinical outcome
Source: PLOS journal article supplement (doi:10.1371/journal.pcbi.1006832), 2019-03-11
Supplement: S1 (10.1371/journal.pcbi.1006832.s001) [file journal.pcbi.1006832.s001]

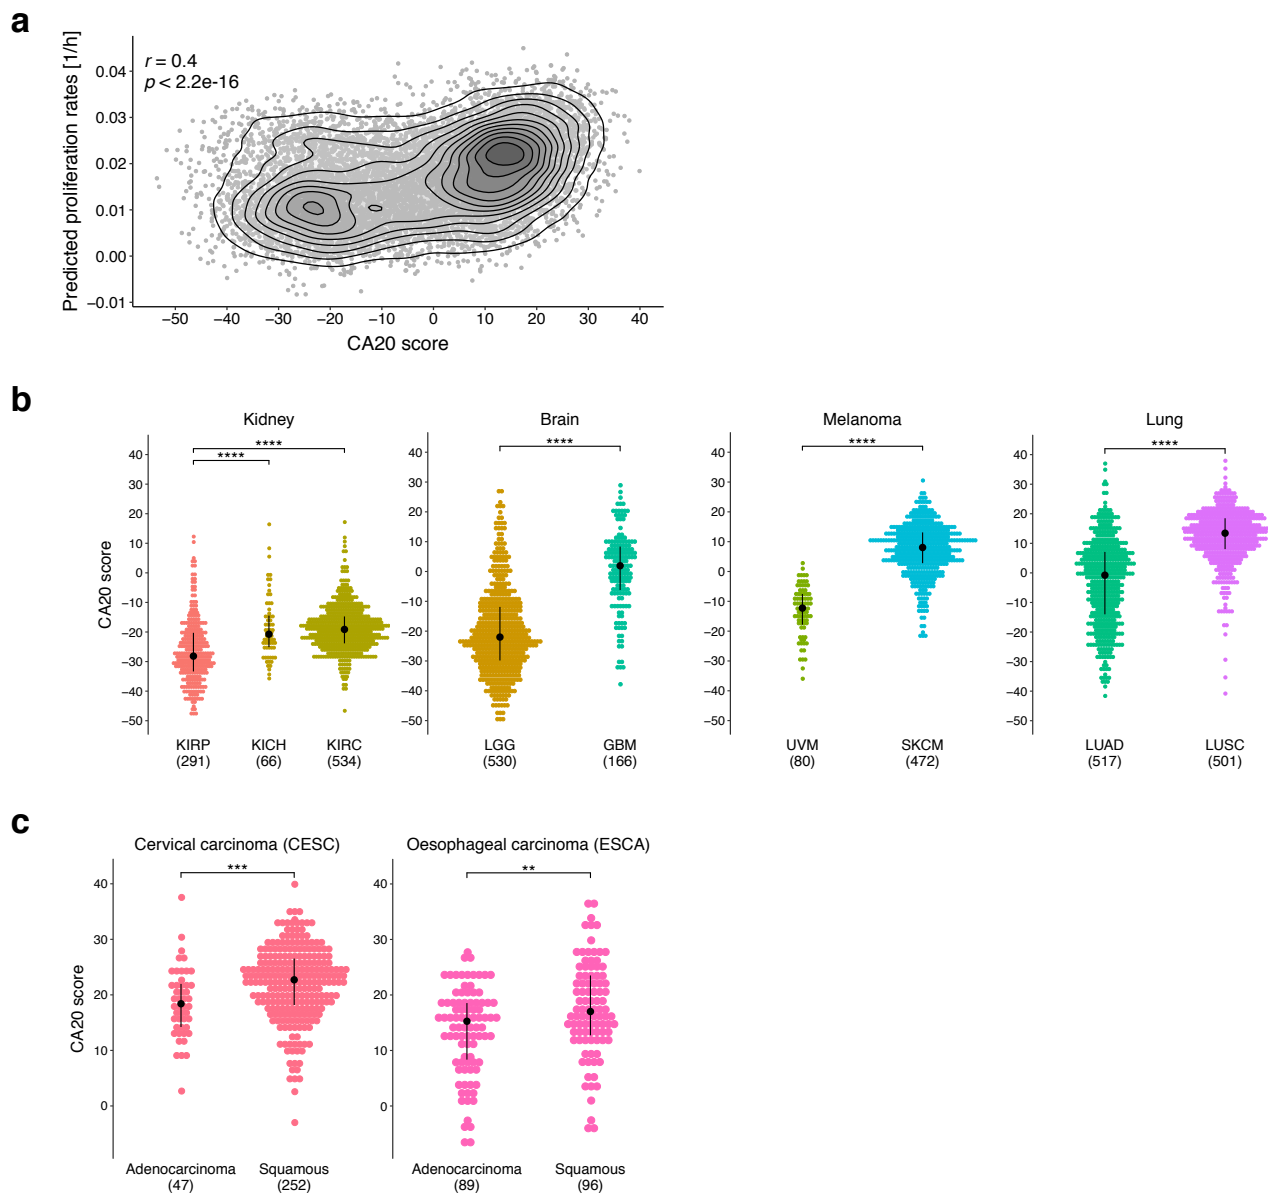

**Supplementary Figure 1: Pan-cancer analyses of centrosome amplification-associated gene expression.**
