# Supplementary material for: Pan-cancer association of a centrosome amplification gene expression signature with genomic alterations and clinical outcome
Source: PLOS journal article supplement (doi:10.1371/journal.pcbi.1006832), 2019-03-11
Supplement: S7 (10.1371/journal.pcbi.1006832.s007) [file journal.pcbi.1006832.s007]

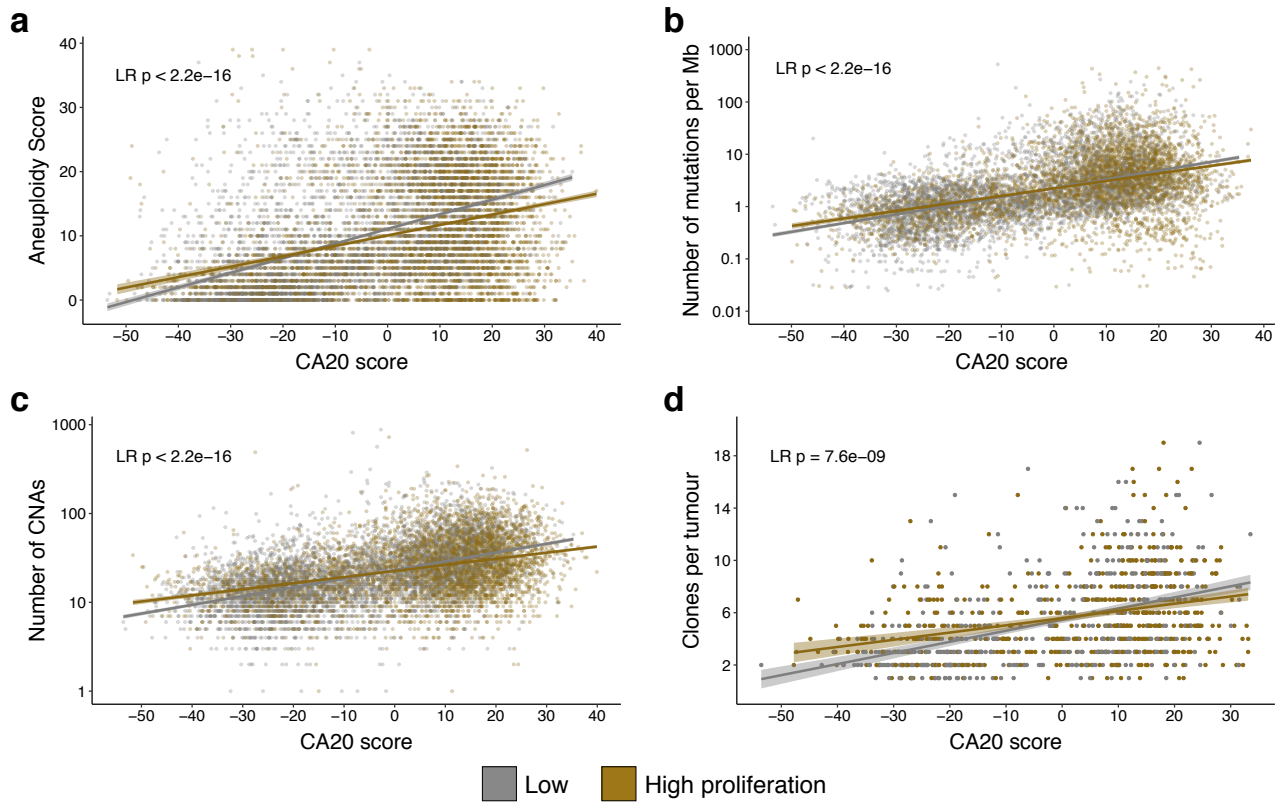

**Supplementary Figure 7: CA20 is associated with genomic instability features independently of cell proliferation.**
